# Supplementary material
Source: publisher site journal article supplement (https://www.dovepress.com/article/410958)
Supplement: Supplementary file 1 [file get_supplementary_file.php]

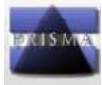

## Supplementary Table 1: PRISMA 2020 Checklist

| Section and Topic             | Item # | Checklist item                                                                                                                                                                                                                                                                                       | Location where item is reported |
|-------------------------------|--------|------------------------------------------------------------------------------------------------------------------------------------------------------------------------------------------------------------------------------------------------------------------------------------------------------|---------------------------------|
| <b>TITLE</b>                  |        |                                                                                                                                                                                                                                                                                                      |                                 |
| Title                         | 1      | Identify the report as a systematic review.                                                                                                                                                                                                                                                          | Page 1/ Line 3-6                |
| <b>ABSTRACT</b>               |        |                                                                                                                                                                                                                                                                                                      |                                 |
| Abstract                      | 2      | See the PRISMA 2020 for Abstracts checklist.                                                                                                                                                                                                                                                         | Page 1-3/ Line 17-44            |
| <b>INTRODUCTION</b>           |        |                                                                                                                                                                                                                                                                                                      |                                 |
| Rationale                     | 3      | Describe the rationale for the review in the context of existing knowledge.                                                                                                                                                                                                                          | Page 3-6/ Line 47-112           |
| Objectives                    | 4      | Provide an explicit statement of the objective(s) or question(s) the review addresses.                                                                                                                                                                                                               | Page 6/ Line 113-116            |
| <b>METHODS</b>                |        |                                                                                                                                                                                                                                                                                                      |                                 |
| Eligibility criteria          | 5      | Specify the inclusion and exclusion criteria for the review and how studies were grouped for the syntheses.                                                                                                                                                                                          | Page 6-7/ Line 123-137          |
| Information sources           | 6      | Specify all databases, registers, websites, organisations, reference lists and other sources searched or consulted to identify studies. Specify the date when each source was last searched or consulted.                                                                                            | Page 7-8/ Line 144-146          |
| Search strategy               | 7      | Present the full search strategies for all databases, registers and websites, including any filters and limits used.                                                                                                                                                                                 | Page 7-8/ Line 141-146          |
| Selection process             | 8      | Specify the methods used to decide whether a study met the inclusion criteria of the review, including how many reviewers screened each record and each report retrieved, whether they worked independently, and if applicable, details of automation tools used in the process.                     | Page 8/ Line 150-154            |
| Data collection process       | 9      | Specify the methods used to collect data from reports, including how many reviewers collected data from each report, whether they worked independently, any processes for obtaining or confirming data from study investigators, and if applicable, details of automation tools used in the process. | Page 8/ Line 157-158            |
| Data items                    | 10a    | List and define all outcomes for which data were sought. Specify whether all results that were compatible with each outcome domain in each study were sought (e.g. for all measures, time points, analyses), and if not, the methods used to decide which results to collect.                        | Page 7/ Line 128-131            |
|                               | 10b    | List and define all other variables for which data were sought (e.g. participant and intervention characteristics, funding sources). Describe any assumptions made about any missing or unclear information.                                                                                         | Page 8/ Line 158-162            |
| Study risk of bias assessment | 11     | Specify the methods used to assess risk of bias in the included studies, including details of the tool(s) used, how many reviewers assessed each study and whether they worked independently, and if applicable, details of automation tools used in the process.                                    | Page 9/ Line 168-176            |
| Effect measures               | 12     | Specify for each outcome the effect measure(s) (e.g. risk ratio, mean difference) used in the synthesis or presentation of results.                                                                                                                                                                  | Page 8-9/ Line 185-188          |
| Synthesis methods             | 13a    | Describe the processes used to decide which studies were eligible for each synthesis (e.g. tabulating the study intervention characteristics and comparing against the planned groups for each synthesis (item #5)).                                                                                 | Page 6-7/ Line 123-131          |
|                               | 13b    | Describe any methods required to prepare the data for presentation or synthesis, such as handling of missing summary statistics, or data conversions.                                                                                                                                                | Page 9/ Line 180-185            |
|                               | 13c    | Describe any methods used to tabulate or visually display results of individual studies and syntheses.                                                                                                                                                                                               | Page 9/ Line 179-180            |
|                               | 13d    | Describe any methods used to synthesize results and provide a rationale for the choice(s). If meta-analysis was performed, describe the model(s), method(s) to identify the presence and extent of statistical heterogeneity, and software package(s) used.                                          | Page 9/ Line 179-184            |
|                               | 13e    | Describe any methods used to explore possible causes of heterogeneity among study results (e.g. subgroup analysis, meta-regression).                                                                                                                                                                 | Page 10/ Line 194-201           |

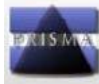

## Supplementary Table 1 (Continued)

| Section and Topic             | Item # | Checklist item                                                                                                                                                                                                                                                                       | Location where item is reported |
|-------------------------------|--------|--------------------------------------------------------------------------------------------------------------------------------------------------------------------------------------------------------------------------------------------------------------------------------------|---------------------------------|
|                               | 13f    | Describe any sensitivity analyses conducted to assess robustness of the synthesized results.                                                                                                                                                                                         | Page 10/ Line 189-190           |
| Reporting bias assessment     | 14     | Describe any methods used to assess risk of bias due to missing results in a synthesis (arising from reporting biases).                                                                                                                                                              | Page 10/ Line 190-191           |
| Certainty assessment          | 15     | Describe any methods used to assess certainty (or confidence) in the body of evidence for an outcome.                                                                                                                                                                                | —                               |
| <b>RESULTS</b>                |        |                                                                                                                                                                                                                                                                                      |                                 |
| Study selection               | 16a    | Describe the results of the search and selection process, from the number of records identified in the search to the number of studies included in the review, ideally using a flow diagram.                                                                                         | Page 10-11/ Line 204-210        |
|                               | 16b    | Cite studies that might appear to meet the inclusion criteria, but which were excluded, and explain why they were excluded.                                                                                                                                                          | Page 11/ Line 209-210           |
| Study characteristics         | 17     | Cite each included study and present its characteristics.                                                                                                                                                                                                                            | Page 11-12/ Line 213-233        |
| Risk of bias in studies       | 18     | Present assessments of risk of bias for each included study.                                                                                                                                                                                                                         | Page 12/ Line 235-245           |
| Results of individual studies | 19     | For all outcomes, present, for each study: (a) summary statistics for each group (where appropriate) and (b) an effect estimate and its precision (e.g. confidence/credible interval), ideally using structured tables or plots.                                                     | —                               |
| Results of syntheses          | 20a    | For each synthesis, briefly summarise the characteristics and risk of bias among contributing studies.                                                                                                                                                                               | Page 11-12/ Line 213-245        |
|                               | 20b    | Present results of all statistical syntheses conducted. If meta-analysis was done, present for each the summary estimate and its precision (e.g. confidence/credible interval) and measures of statistical heterogeneity. If comparing groups, describe the direction of the effect. | Page 13-17/ Line 247-331        |
|                               | 20c    | Present results of all investigations of possible causes of heterogeneity among study results.                                                                                                                                                                                       | Page 17/ Line 333-339           |
|                               | 20d    | Present results of all sensitivity analyses conducted to assess the robustness of the synthesized results.                                                                                                                                                                           | Page 17/ Line 341-343           |
| Reporting biases              | 21     | Present assessments of risk of bias due to missing results (arising from reporting biases) for each synthesis assessed.                                                                                                                                                              | Page 17-18/ Line 343-345        |
| Certainty of evidence         | 22     | Present assessments of certainty (or confidence) in the body of evidence for each outcome assessed.                                                                                                                                                                                  | —                               |
| <b>DISCUSSION</b>             |        |                                                                                                                                                                                                                                                                                      |                                 |
| Discussion                    | 23a    | Provide a general interpretation of the results in the context of other evidence.                                                                                                                                                                                                    | Page 18/ Line 347-354           |
|                               | 23b    | Discuss any limitations of the evidence included in the review.                                                                                                                                                                                                                      | Page 22-23/ Line 444-457        |
|                               | 23c    | Discuss any limitations of the review processes used.                                                                                                                                                                                                                                | —                               |
|                               | 23d    | Discuss implications of the results for practice, policy, and future research.                                                                                                                                                                                                       | Page 23/ Line 466-448           |
| <b>OTHER INFORMATION</b>      |        |                                                                                                                                                                                                                                                                                      |                                 |
| Registration and protocol     | 24a    | Provide registration information for the review, including register name and registration number, or state that the review was not registered.                                                                                                                                       | —                               |
|                               | 24b    | Indicate where the review protocol can be accessed, or state that a protocol was not prepared.                                                                                                                                                                                       | —                               |

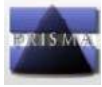

## Supplementary Table 1 (Continued)

| Section and Topic                              | Item # | Checklist item                                                                                                                                                                                                                             | Location where item is reported |
|------------------------------------------------|--------|--------------------------------------------------------------------------------------------------------------------------------------------------------------------------------------------------------------------------------------------|---------------------------------|
|                                                | 24c    | Describe and explain any amendments to information provided at registration or in the protocol.                                                                                                                                            | —                               |
| Support                                        | 25     | Describe sources of financial or non-financial support for the review, and the role of the funders or sponsors in the review.                                                                                                              | Page 24/ Line 475               |
| Competing interests                            | 26     | Declare any competing interests of review authors.                                                                                                                                                                                         | Page 24/ Line 486               |
| Availability of data, code and other materials | 27     | Report which of the following are publicly available and where they can be found: template data collection forms; data extracted from included studies; data used for all analyses; analytic code; any other materials used in the review. | Page 25/ Line 489-490           |

From: Page MJ, McKenzie JE, Bossuyt PM, Boutron I, Hoffmann TC, Mulrow CD, et al. The PRISMA 2020 statement: an updated guideline for reporting systematic reviews. *BMJ* 2021;372:n71. doi: 10.1136/bmj.n71

For more information, visit: <http://www.prisma-statement.org/>

**Supplementary Table 2: Search strategy**

|    | <b>Search strategy (PubMed)</b>                                                                                                                                                                                                                                                                                                   | <b>Results</b> |
|----|-----------------------------------------------------------------------------------------------------------------------------------------------------------------------------------------------------------------------------------------------------------------------------------------------------------------------------------|----------------|
| #1 | (randomized controlled trial [Publication Type] OR controlled clinical trial [Publication Type] OR randomized [Title/Abstract] OR placebo [Title/Abstract] OR clinical trials as topic [MeSH Terms:noexp] OR randomly[Title/Abstract] OR trial[Title]) NOT (animals[MeSH Terms] NOT (humans[MeSH Terms] AND animals[MeSH Terms])) | 1,360,724      |
| #2 | (((((HFO OR HFNC OR HFNP OR HHFNOX OR HFNO OR NHF) OR (humidification oxygen)) OR (Humidication oxygen)) OR (humidified oxygen)) OR (High Flow Oxygen)) OR (nasal high flow)) OR (High flow nasal)                                                                                                                                | 22,627         |
| #3 | (((((hypercapnic) OR (hypercapneic)) OR (hypercapnia)) OR (acidotic)) OR (AT2RF)) OR (type II respiratory failure)) OR (type two respiratory failure)                                                                                                                                                                             | 92,935         |
| #4 | #1 AND #2 AND #3                                                                                                                                                                                                                                                                                                                  | 280            |
|    | <b>Search strategy (Embase)</b>                                                                                                                                                                                                                                                                                                   | <b>Results</b> |
| #1 | 'Clinical trial (topic)'/exp                                                                                                                                                                                                                                                                                                      | 399,233        |
| #2 | 'trial': ti                                                                                                                                                                                                                                                                                                                       | 372,231        |
| #3 | 'random': ab,ti OR 'placebo':ab,ti OR 'double-blind':ab,ti OR 'randomized':ab,ti OR 'randomly':ab,ti                                                                                                                                                                                                                              | 1,825,315      |
| #4 | #1 OR #2 OR #3                                                                                                                                                                                                                                                                                                                    | 2,211,694      |
| #5 | (hypercapneic:ab,ti OR hypercapnic:ab,ti OR hypercapnia:ab,ti OR acidotic:ab,ti OR at2rf:ab,ti OR (type AND ii AND respiratory AND failure:ab,ti) OR (type AND two AND respiratory AND failure:ab,ti)) AND ('high flow nasal cannula therapy'/exp OR 'high flow nasal cannula                                                     | 694            |

|    |                                                                                                                                                                                                                                                                             |                |
|----|-----------------------------------------------------------------------------------------------------------------------------------------------------------------------------------------------------------------------------------------------------------------------------|----------------|
|    | therapy' OR (humidication AND oxygen:ab,ti) OR (humidified AND oxygen:ab,ti) OR (high AND flow AND oxygen:ab,ti) OR (high AND flow AND nasal:ab,ti) OR (nasal AND high AND flow:ab,ti) OR hfo:ab,ti OR hfnc:ab,ti OR hfnp:ab,ti OR hhfnox:ab,ti OR hfno:ab,ti OR nhf:ab,ti) |                |
| #6 | #4 AND #5                                                                                                                                                                                                                                                                   | 140            |
|    | <b>Search strategy (Cochrane Library)</b>                                                                                                                                                                                                                                   | <b>Results</b> |
| #1 | (high flow): ti,ab,kw OR (high-flow):ti,ab,kw (Word variations have been searched)                                                                                                                                                                                          | 13,564         |
| #2 | (Humidication oxygen): ti,ab,kw OR (humidified oxygen):ti,ab,kw OR (HFO):ti,ab,kw OR (hfnc):ti,ab,kw OR (hfnp):ti,ab,kw OR (hhfnox):ti,ab,kw OR (hfno):ti,ab,kw OR (NHF):ti,ab,kw (Word variations have been searched)                                                      | 1,275          |
| #3 | #1 OR #2                                                                                                                                                                                                                                                                    | 13,864         |
| #4 | MeSH descriptor: [Hypercapnia] explode all trees                                                                                                                                                                                                                            | 534            |
| #5 | (hypercapnic) OR (hypercapneic) OR (hypercapnia) OR (acidotic) OR (AT2RF) (Word variations have been searched)                                                                                                                                                              | 2,085          |
| #6 | (type II respiratory failure) OR (type two respiratory failure) (Word variations have been searched)                                                                                                                                                                        | 5,540          |
| #7 | #6 OR #5 OR #4                                                                                                                                                                                                                                                              | 7,284          |
| #8 | #7 AND #3                                                                                                                                                                                                                                                                   | 622            |

**Supplementary Table 3: Results of risk assessment of bias in the included studies**

| <b>Study</b>         | <b>random sequence generation</b> | <b>allocation concealment</b> | <b>blinding of participants</b> | <b>blinding of outcome assessment</b> | <b>incomplete outcome data</b> | <b>selective reporting</b> | <b>other biases</b> |
|----------------------|-----------------------------------|-------------------------------|---------------------------------|---------------------------------------|--------------------------------|----------------------------|---------------------|
| Cortegiani A,2020    | Low                               | Low                           | High                            | Low                                   | Low                            | Low                        | Low                 |
| Li C,2019            | Unclear                           | Unclear                       | High                            | Unclear                               | Low                            | Low                        | Low                 |
| Wang J,2019          | Unclear                           | Unclear                       | High                            | Unclear                               | Low                            | Low                        | Unclear             |
| Doshi PB,2020        | Low                               | Low                           | High                            | Low                                   | Low                            | Low                        | Unclear             |
| Papachatzakis Y,2020 | Unclear                           | Unclear                       | High                            | Unclear                               | Low                            | Low                        | Low                 |
| Tan D,2020           | Low                               | Low                           | High                            | Low                                   | Low                            | Low                        | Low                 |
| Jing G,2019          | Low                               | Low                           | High                            | Unclear                               | Low                            | Low                        | Low                 |
| Yu Z,2019            | Low                               | Low                           | High                            | Unclear                               | Low                            | Low                        | Unclear             |
| Li X,2020            | Low                               | Low                           | High                            | Low                                   | Low                            | Low                        | Low                 |
| Xia J,2022           | Low                               | Low                           | High                            | Low                                   | Low                            | Low                        | Low                 |
